# Supplementary material for: Duplication and Sub/Neofunctionalization of Malvolio, an Insect Homolog of Nramp, in the Subsocial Beetle Nicrophorus vespilloides
Source: PubMed Central journal article supplement (PMC5633388; doi:10.1534/g3.117.300183), 2017-08-22

Supplementary Figure S1: Expression of Mvl in different tissues, stages, in *Drosophila melanogaster*. Data from Flybase (Gelbart and Emmert, 2013. <http://flybase.org/reports/FBrf0212041.html>). Data analyzed here are deposited in Dryad.

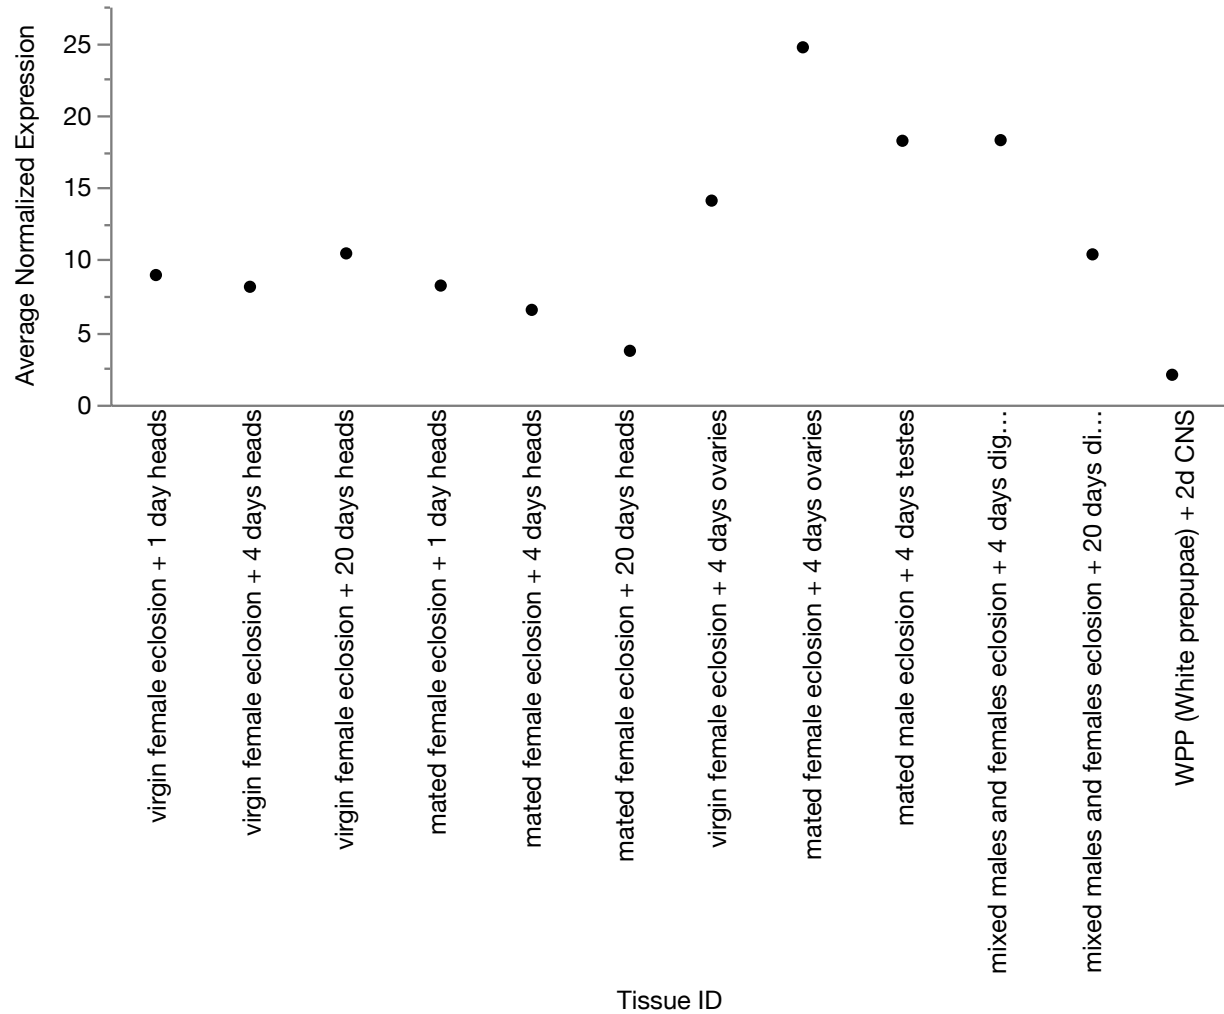

Supplement: 3393FigureS1.pdf [file 3393FigureS1.pdf]
